# Supplementary material for: CD74 is a regulator of hematopoietic stem cell maintenance
Source: PLoS Biol. 2021 Mar 4;19(3):e3001121. doi: 10.1371/journal.pbio.3001121 (PMC7963458; doi:10.1371/journal.pbio.3001121)
Supplement: S11 Data — (XLSX) [file pbio.3001121.s018.xlsx]

## Sheet: Sheet1
	Supplementary Figure 3
	A									B									C									D
	Supll Figure 3A									Supll Figure 3B									Supll Figure 3C									Supll Figure 3D
	week 6			week 16			week 24			week 6			week 16			week 24			week 6			week 16			week 24			week 6			week 16			week 24
	WT CD451	WT CD452		WT CD451	WT CD452		WT CD451	WT CD452		WT CD451	WT CD452		WT CD451	WT CD452		WT CD451	WT CD452		WT CD451	WT CD452		WT CD451	WT CD452		WT CD451	WT CD452		WT CD451	WT CD452		WT CD451	WT CD452		WT CD451	WT CD452
	38.6	35.5		38.9	44.2		49.5	44.2		55.5	42.5		48.5	46.8		48.8	46.1		55.4	42.3		41.4	56.4		39.9	59.2		53.5	45.9		45.3	53.2		40.4	58.3
	44.2	38.4		44.1	41.2		40.8	54.4		46.4	52.6		48.8	46.5		35.3	58.7		64.1	32.7		60.8	37.4		62.6	36.4		56.5	42.7		44.5	54.2		52	46.2
	33.4	39.2		37.6	42.3		35.9	40.4		40.3	57.7		50.1	47.1		43.2	50.3		51.7	45.9		55.3	42.8		56.4	42.3		55.6	43.9		49.8	48.6		47	51.1
	37.1	43		30.3	65.5		51.3	42.5		40	58.8		28	68.7		31.2	66		53.6	44		68.3	29.6		59.4	39		57.5	41.9		51.5	46.8		42.1	56.9
	36.6	52		53.8	40.2		56.7	37.3		35.7	63.4		49.1	41.5		62.3	34.8		45.5	53.5		44.5	53.9		31.8	61.6		57.9	40.6		47.3	52.2		44.4	54.6
	59.2	31.9		46.5	47.8		48.7	46.8		61.2	37.8		47.7	47.8		61.6	36.2		38.6	60.4		51.7	47.5		54.9	42.8		55.6	42		60.9	38.5		29.3	64.9
	48.7	44.6		49.1	46.1		49.5	43.7		44.4	54.8		49.1	46.1		48.8	49		62.5	36.3		63.4	35.6		74.1	23.6		59.4	38.1		50.8	48.3		47.5	51.4
	45.5	43.6		50.4	45.5		49.7	43		60.7	33.8		50.4	45.5		53.4	36.3		53.8	45.6		50.3	47.7		39.4	56		54.1	41.4		54.4	45.1		57	42.2
	37.6	45.7		40	55.2		30.3	63.3		51.2	39.1		40	55.2		43.7	40.7		45	54.3		51	46.4		30.1	67					57.2	42.4		39.9	57.1
							33.4	58								34.2	50		45.1	54.2		36.7	60.8		34.5	63.2					58.6	40.5		42.7	56.3
							40.6	51.4								44.5	33								68	29.9					45.4	50.6		56.7	39.5
																															52.7	39.8
																															42.1	53.5
	E							F									G
	Supll Figure 3E							Supll Figure 3F									Supll Figure 3G										H							I								J
	week 16			week 24				week 6			week 16			week 24			week 6			week 16			week 24				Supll Figure 3H						Supll Figure 3I									Supll Figure 3J
	WT CD451	WT CD452		WT CD451	WT CD452			CD45.1 WT	CD45.2 WT		CD45.1 WT	CD45.2 WT		CD45.1 WT	CD45.2 WT		CD45.1 WT	CD45.2 WT		CD45.1 WT	CD45.2 WT		CD45.1 WT	CD45.2 WT			PB LSK			PB LSK aftre AMD 3100			week 6			week 16			week 24			week 6			week 16			week 24
	38.3	47.7		30.9	64.8			51.5	45.1		59.4	39.8		82.4	14.4		44.1	55.4		56	43		20.4	64.2			CD45.1 WT	CD45.2 WT		CD45.1 WT	CD45.2 WT		WT	CD74-/-		WT	CD74-/-		WT	CD74-/-		WT	CD74-/-		WT	CD74-/-		WT	CD74-/-
	41.2	42.9		62.1	33.6			50.6	47.9		55.1	44.1		56.3	36.4		45.8	53.5		40.1	57.6		43.1	41.7			50	0		100	0		33.8	64.8		23.9	74.9		22.9	76.1		17.5	81.6		14.6	83.7		13.8	84.1
	45.5	41.3		60.1	35.9			67.6	30.4		46.3	52.6		49.9	41.5		47.2	52.4		47.9	50.5		49.1	37.3			0	100		20	50		24.1	73.6		28.6	70.4		36.8	62.4		25.4	74.2		18.5	80.8		17.4	79.9
	50.2	43.8		55.5	41.4			51.9	44.5		44.4	54		44.2	45.1		48.5	51		28.6	68.8		59.6	39.9			100	0		27.3	72.7		28.5	68.4		33.9	65.4		26.2	73.1		18.4	81.6		18.1	80.5		19.6	79.2
	36.6	58.1		45.6	51.3			57.9	40.9		54	45		38	60.9		47	52.4		34.8	63.3		32.7	66.6			100	0		50	25		23.9	73.9		20	79.6		26.3	73.2		19.5	80.5		19.5	79.7		27.1	71.7
	47.1	51.7		37.7	60.8			49.3	48.4		50.9	47.5		63.1	36.2		46.1	53.5		42.4	56.1		35.1	64.1			50	50		33.3	41.7		39	60.7		21	77.8		36.7	62.1		24.8	72		30.2	68.8		22.9	75.7
	43.2	55.7		43.7	53.5			56.9	42.6		30.4	67.5		46.3	52.7		50.4	49.1		26.7	61.9		19.6	79.6			0	0		25	75		33.5	65.9		26.7	72.4		13.4	85.7		16.8	79.8		14.2	84.7		17.6	82.1
	41.6	57.1						48.8	50.6		49	47.4		47.2	51.3		46.4	52.7		28.6	61.7												36.2	63.4		32	66.9		25.4	60.7		21.6	75.8		11.1	87.8		7.18	92.5
								53.3	46.4		48.6	47.5		58.8	40		56.7	42.6		35.5	56.6												36	63.7		21.4	77.7		12.4	71.2		19.5	77.5		14.5	84.5		13.3	86.1
								68.9	30.8		54.9	43.4		26.5	72.7		46.2	52.6		31.2	57.2												29.2	69.4		37.5	61.5		22.8	60.7		29.3	69.8		26.2	72.9
								49	50.7		61.6	36.3		26.5	72.6		49.1	49		39.1	60.6												37.8	60.5		24.6	74.4		28.2	70.5		27.4	72.2		14.7	82.7
								47.8	51.9		53.6	41.9		34.7	63.6		49.3	46.5		50.5	48.2												28.9	70.2		24.8	73.5		29.9	69.4		20.1	79.4		18.5	78.3
											53.3	35.4		42.8	56.6		50.5	48.9		41.1	58.4												29.1	69.9		19.7	78.5		13.3	85.9		21	78.4		13.6	83.4
											48.7	40.6					50.8	48.3																		26.9	71.6		13.3	84.3		16.5	83.2		10	87.1
											51.7	39.3					50.7	48.5																		18.9	78					17.1	82		17.8	80.7
											50.5	39.1					49.3	49.6																		23.9	73.8					38.3	61.7		19.8	78.7
											43.8	44.5																								17.8	80.4					19.4	79.7		8.77	89.7
											50.6	38.8																								17.2	80.5					23.5	75.6
																																				23.4	74.7					24.6	74.5
																																				23.7	72.7					17.3	82.2
																																				32.6	64.7					28.9	70.5
																																				37	60.8
																																				31.3	65.9
																																				32.6	64.9
																																				27.9	69.2
																																				30.8	66.9
																																				23	75.2
																																				48	49
